# Supplementary material
Source: PubMed Central journal article supplement (PMC3149329)
Supplement: supp_M111.221010_jbc.M111.221010-1.pdf [file supp_M111.221010_jbc.M111.221010-1.pdf]

Charlot-Rabiega *et al*,  
Supplemental Figure

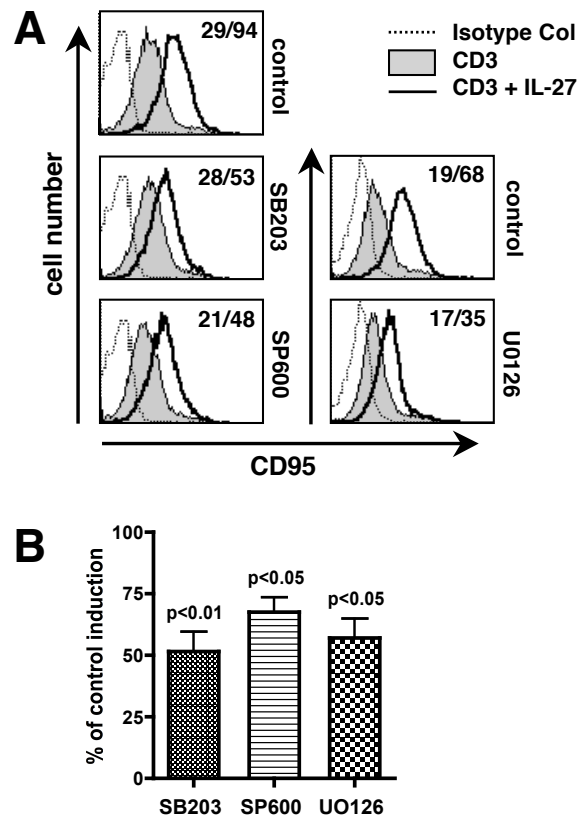

**Role of MAPK in IL-27-mediated CD95 induction in naive CD4<sup>+</sup> T cells.** A) Purified naive CD4<sup>+</sup> T cells were cultured for 16 hrs with CD3-coated beads with or without IL-27 and in the absence (control) or presence of SB203580 (SB203), SP600125 (SP600), or U0126 (all at 10  $\mu$ M). Control staining and staining for CD95 are represented as indicated (x-axis, log fluorescence intensity; y-axis: cell number). Results are representative of 4 independent experiments performed with 3 different donors. B) The induction of CD95 observed in the presence of the inhibitors relative to that observed in the control is shown as mean  $\pm$  SEM of 4 independent experiments.
